# Supplementary material
Source: PubMed Central journal article supplement (PMC1302781)
Supplement: biophysj_84_4_2137__1.pdf [file biophysj_84_4_2137__1.pdf]

# *Supporting Information*

## Simulating Structural and Thermodynamic Properties of Carcinogen-Damaged DNA

Shixiang Yan,<sup>\*</sup> Min Wu,<sup>\*</sup> Dinshaw J. Patel,<sup>†</sup> Nicholas E. Geacintov,<sup>\*</sup> and Suse Broyde<sup>‡</sup>

<sup>\*</sup> *Department of Chemistry, New York University, New York, NY 10003, USA*

<sup>†</sup> *Cellular Biochemistry & Biophysics Program, Memorial Sloan-Kettering Cancer Center, New York, NY 10021, USA*

<sup>‡</sup> *Department of Biology, New York University, New York, NY 10003, USA*

**Running Title:** BP-dG DNA Structures and Thermodynamics

**Abbreviations:** (+)-*anti*-BPDE, (+)-(7*R*,8*S*,9*S*,10*R*)-7,8-dihydroxy-9,10-epoxy-7,8,9,10-tetrahydrobenzo[*a*]pyrene; (−)-*anti*-BPDE, (−)-(7*S*,8*R*,9*R*,10*S*)-7,8-dihydroxy-9,10-epoxy-7,8,9,10-tetrahydrobenzo[*a*]pyrene; BP, benzo[*a*]pyrene; BPDE, benzo[*a*]pyrene diol epoxide; DNA, deoxyribonucleic acid; MD, molecular dynamics; MM-PBSA, molecular mechanics Poisson–Boltzmann surface area; NER, nucleotide excision repair; NMR, nuclear magnetic resonance; NOE, nuclear Overhauser effect; PAH, polycyclic aromatic hydrocarbon; PME, particle mesh Ewald; RESP, restrained electrostatic potential fitting; RMSD, root-mean-square deviation; SASA, solvent-accessible surface area;

**Keywords:** benzo[*a*]pyrene diol epoxide DNA adduct structure and stability; molecular dynamics; free energy calculations; nucleotide excision repair; hydration

Address reprint requests to Suse Broyde, Department of Biology, New York University, New York, NY 10003, Telephone: 212-998-8231, Fax: 212-995-4015, Email: [broyde@nyu.edu](mailto:broyde@nyu.edu); and to Nicholas E. Geacintov, Department of Chemistry, New York University, New York, NY 10003, Telephone: 212-998-8407, Fax: 212-998-8421, Email: [ng1@nyu.edu](mailto:ng1@nyu.edu).

Table S1: Partial Charges, Atom Types and Topologies of 10*S* (+)- and 10*R* (-)-*trans-anti*-[BP]-*N*<sup>2</sup>-dG Nucleotides

| Atom Name | Atom Type | Topology | Partial Charge                                                      |                                                                     |
|-----------|-----------|----------|---------------------------------------------------------------------|---------------------------------------------------------------------|
|           |           |          | 10 <i>S</i> (+)- <i>trans-anti</i> -[BP]- <i>N</i> <sup>2</sup> -dG | 10 <i>R</i> (-)- <i>trans-anti</i> -[BP]- <i>N</i> <sup>2</sup> -dG |
| P         | P         | M        | 1.17223                                                             | 1.17028                                                             |
| O1P       | O2        | E        | -0.77241                                                            | -0.77354                                                            |
| O2P       | O2        | E        | -0.77241                                                            | -0.77354                                                            |
| O5'       | OS        | M        | -0.49304                                                            | -0.49376                                                            |
| C5'       | CT        | M        | -0.00687                                                            | -0.00688                                                            |
| H5'1      | H1        | E        | 0.07581                                                             | 0.07568                                                             |
| H5'2      | H1        | E        | 0.07581                                                             | 0.07568                                                             |
| C4'       | CT        | M        | 0.16379                                                             | 0.16351                                                             |
| H4'       | H1        | E        | 0.11824                                                             | 0.11804                                                             |
| O4'       | OS        | S        | -0.39272                                                            | -0.39160                                                            |
| C1'       | CT        | B        | 0.04836                                                             | 0.05561                                                             |
| H1'       | H2        | E        | 0.17746                                                             | 0.15598                                                             |
| N9        | N*        | B        | 0.07581                                                             | 0.10680                                                             |
| C8        | CK        | S        | 0.15343                                                             | 0.11613                                                             |
| H8        | H5        | E        | 0.19888                                                             | 0.20737                                                             |
| C4        | CB        | S        | -0.01990                                                            | 0.03152                                                             |
| C5        | CB        | B        | 0.33149                                                             | 0.30313                                                             |
| N7        | NB        | E        | -0.64661                                                            | -0.64696                                                            |
| C6        | C         | B        | 0.39564                                                             | 0.45951                                                             |
| O6        | O         | E        | -0.53584                                                            | -0.55905                                                            |
| N1        | NA        | B        | -0.23906                                                            | -0.33858                                                            |
| H1        | H         | E        | 0.25981                                                             | 0.30383                                                             |
| C2        | CA        | B        | 0.23568                                                             | 0.30464                                                             |
| N3        | NC        | E        | -0.27100                                                            | -0.38233                                                            |
| N         | N2        | B        | -0.35480                                                            | -0.38592                                                            |
| HN        | H         | E        | 0.30405                                                             | 0.32591                                                             |
| CC10      | CT        | B        | -0.03026                                                            | -0.12798                                                            |
| HC10      | H1        | E        | 0.14237                                                             | 0.18770                                                             |
| CC9       | CT        | 3        | 0.25759                                                             | 0.00281                                                             |
| HC9       | H1        | E        | 0.09371                                                             | 0.18188                                                             |
| O9        | OH        | S        | -0.63039                                                            | -0.59941                                                            |
| HO9       | HO        | E        | 0.38659                                                             | 0.38323                                                             |
| CC8       | CT        | 3        | 0.05912                                                             | 0.25224                                                             |
| HC8       | H1        | E        | 0.14800                                                             | 0.10931                                                             |
| O8        | OH        | S        | -0.65885                                                            | -0.68483                                                            |
| HO8       | HO        | E        | 0.43345                                                             | 0.42709                                                             |
| CC7       | CT        | 3        | 0.13272                                                             | 0.22805                                                             |
| HC7       | H1        | E        | 0.07420                                                             | 0.02831                                                             |
| O7        | OH        | S        | -0.64502                                                            | -0.64088                                                            |
| HO7       | HO        | E        | 0.44008                                                             | 0.41133                                                             |
| C61       | CA        | S        | -0.01781                                                            | -0.03409                                                            |
| CC6       | CA        | B        | -0.15914                                                            | -0.15798                                                            |
| HC6       | HA        | E        | 0.17977                                                             | 0.15869                                                             |
| C51       | CA        | B        | -0.00498                                                            | -0.00060                                                            |
| C123      | CA        | E        | 0.02634                                                             | 0.01365                                                             |
| CC5       | CA        | B        | -0.15526                                                            | -0.14612                                                            |
| HC5       | HA        | E        | 0.14820                                                             | 0.15146                                                             |

Table S1: *Continued*

| Atom Name | Atom Type | Topology | Partial Charge                                                      |                                                                     |
|-----------|-----------|----------|---------------------------------------------------------------------|---------------------------------------------------------------------|
|           |           |          | 10 <i>S</i> (+)- <i>trans-anti</i> -[BP]- <i>N</i> <sup>2</sup> -dG | 10 <i>R</i> (-)- <i>trans-anti</i> -[BP]- <i>N</i> <sup>2</sup> -dG |
| CC4       | CA        | B        | -0.18860                                                            | -0.19416                                                            |
| HC4       | HA        | E        | 0.15665                                                             | 0.15739                                                             |
| C31       | CA        | B        | 0.06103                                                             | 0.04647                                                             |
| C122      | CA        | E        | 0.09924                                                             | 0.09345                                                             |
| CC3       | CA        | B        | -0.18969                                                            | -0.15628                                                            |
| HC3       | HA        | E        | 0.16369                                                             | 0.16000                                                             |
| CC2       | CA        | B        | -0.19218                                                            | -0.20791                                                            |
| HC2       | HA        | E        | 0.17092                                                             | 0.17746                                                             |
| CC1       | CA        | B        | -0.14998                                                            | -0.16565                                                            |
| HC1       | HA        | E        | 0.15434                                                             | 0.16080                                                             |
| C121      | CA        | S        | 0.00463                                                             | 0.03092                                                             |
| CC12      | CA        | B        | -0.18392                                                            | -0.13924                                                            |
| HC12      | HA        | E        | 0.14358                                                             | 0.14875                                                             |
| CC11      | CA        | B        | -0.04200                                                            | -0.23532                                                            |
| HC11      | HA        | E        | -0.00090                                                            | 0.17144                                                             |
| C102      | CA        | S        | -0.03802                                                            | 0.01405                                                             |
| C101      | CA        | E        | -0.09077                                                            | -0.05492                                                            |
| C3'       | CT        | M        | 0.07169                                                             | 0.07157                                                             |
| H3'       | H1        | E        | 0.09904                                                             | 0.09887                                                             |
| C2'       | CT        | B        | -0.20223                                                            | -0.18867                                                            |
| H2'1      | HC        | E        | 0.08456                                                             | 0.07930                                                             |
| H2'2      | HC        | E        | 0.08737                                                             | 0.08783                                                             |
| O3'       | OS        | M        | -0.52071                                                            | -0.52147                                                            |

Table S2: Added Force Field Parameters

| Angle    | $K_\theta$ (kcal mol <sup>-1</sup> rad <sup>-2</sup> ) | $\theta_{\text{eq}}$ (deg) |
|----------|--------------------------------------------------------|----------------------------|
| N2-CT-CA | 80.0                                                   | 111.20                     |
| H1-CT-CA | 50.0                                                   | 109.50                     |
| OH-CT-CA | 50.0                                                   | 109.50                     |

Table S3: Experimental (Cosman et al., 1992) and Trajectory Averaged Intermolecular NOE Derived Distances Involving BP Benzylic and Pyrenyl Rings for the 10*S* (+)-*trans-anti*-dG Adduct over Additional Different Time Frames

| Experimental NOE |     |      |     | Range        | 1.5–2.0 ns  | 1.5–2.5 ns  |
|------------------|-----|------|-----|--------------|-------------|-------------|
| HC11             | G*6 | H1'  | G18 | [2.76, 4.76] | 4.41 (0.43) | 4.39 (0.45) |
| HC9              | G*6 | H1'  | C7  | [2.03, 3.23] | 2.40 (0.32) | 2.36 (0.32) |
| HC10             | G*6 | H1'  | C7  | [2.81, 4.41] | 4.38 (0.52) | 4.34 (0.49) |
| HC2              | G*6 | H4'  | A19 | [2.94, 4.54] | 3.15 (0.47) | 3.15 (0.46) |
| HC9              | G*6 | H1'  | G*6 | [4.00, 6.00] | 4.60 (0.50) | 4.63 (0.47) |
| HC10             | G*6 | H1'  | G*6 | [2.85, 4.45] | 3.83 (0.32) | 3.77 (0.27) |
| HC10             | G*6 | HN   | G*6 | [2.50, 4.50] | 2.97 (0.06) | 2.97 (0.06) |
| HC8              | G*6 | HN   | G*6 | [2.00, 4.00] | 2.37 (0.20) | 2.38 (0.20) |
| HC9              | G*6 | HN   | G*6 | [3.00, 5.00] | 3.23 (0.17) | 3.22 (0.17) |
| HC8              | G*6 | H1   | G*6 | [2.68, 4.68] | 3.90 (0.23) | 3.92 (0.23) |
| HC9              | G*6 | H1   | G*6 | [3.53, 5.53] | 4.52 (0.20) | 4.53 (0.20) |
| HC8              | G*6 | H1   | G16 | [3.25, 5.25] | 4.61 (0.56) | 4.70 (0.53) |
| HC8              | G*6 | H1   | G18 | [3.30, 5.30] | 7.28 (0.37) | 7.33 (0.36) |
| HC4              | G*6 | H5'1 | G18 | [3.17, 5.17] | 6.29 (0.69) | 6.25 (0.74) |
| HC4              | G*6 | H5'2 | G18 | [3.17, 5.17] | 6.69 (0.72) | 6.67 (0.76) |
| HC5              | G*6 | H5'1 | G18 | [3.17, 5.17] | 4.92 (0.47) | 4.87 (0.53) |
| HC5              | G*6 | H5'2 | G18 | [3.17, 5.17] | 4.80 (0.55) | 4.78 (0.59) |
| HC6              | G*6 | H5'1 | G18 | [2.13, 4.13] | 5.08 (0.42) | 5.01 (0.48) |
| HC6              | G*6 | H5'2 | G18 | [2.13, 4.13] | 4.15 (0.37) | 4.10 (0.42) |
| HC4              | G*6 | H4'  | G18 | [2.31, 4.31] | 4.41 (0.58) | 4.41 (0.59) |
| HC4              | G*6 | H4'  | A19 | [2.31, 4.31] | 4.16 (0.94) | 4.21 (0.99) |
| HC5              | G*6 | H4'  | G18 | [2.31, 4.31] | 2.91 (0.36) | 2.91 (0.37) |
| HC5              | G*6 | H4'  | A19 | [2.31, 4.31] | 5.87 (0.87) | 5.91 (0.90) |
| HC1              | G*6 | H4'  | A19 | [2.69, 4.69] | 4.09 (0.81) | 4.07 (0.81) |
| HC3              | G*6 | H4'  | A19 | [2.69, 4.69] | 2.98 (0.62) | 3.02 (0.69) |

Table S4: Experimental (de los Santos et al., 1992) and Trajectory Averaged Intermolecular NOE Derived Distances Involving BP Benzylic and Pyrenyl Rings for the 10*R* (–)-*trans-anti*-dG Adduct over Additional Different Time Frames

| Experimental NOE |     |     |     | Range        | 1.5–2.0 ns  | 1.5–2.5 ns  |
|------------------|-----|-----|-----|--------------|-------------|-------------|
| HC9              | G*6 | H1  | G*6 | [2.68, 4.28] | 4.83 (0.16) | 4.85 (0.16) |
| HC9              | G*6 | HN  | G*6 | [2.20, 3.80] | 3.64 (0.13) | 3.65 (0.13) |
| HC10             | G*6 | HN  | G*6 | [1.96, 3.56] | 2.72 (0.10) | 2.72 (0.10) |
| HC10             | G*6 | H1' | G*6 | [4.20, 5.70] | 4.52 (0.35) | 4.55 (0.33) |
| HC10             | G*6 | H1' | C7  | [1.98, 3.38] | 2.66 (0.42) | 2.63 (0.41) |
| HC11             | G*6 | H1' | C7  | [2.14, 3.14] | 2.62 (0.41) | 2.65 (0.40) |
| HC11             | G*6 | H4' | C7  | [3.63, 5.13] | 4.29 (0.60) | 4.39 (0.59) |
| HC11             | G*6 | HN  | G*6 | [1.95, 3.55] | 2.75 (0.23) | 2.77 (0.23) |
| HC11             | G*6 | H1  | G*6 | [2.23, 3.83] | 4.10 (0.28) | 4.14 (0.28) |
| HC11             | G*6 | H1  | G16 | [2.85, 4.45] | 4.71 (0.26) | 4.69 (0.27) |
| HC12             | G*6 | H1' | C7  | [3.18, 4.18] | 4.04 (0.74) | 4.10 (0.71) |
| HC12             | G*6 | H4' | T8  | [1.91, 3.91] | 3.21 (0.48) | 3.20 (0.46) |
| HC12             | G*6 | HN  | G*6 | [2.51, 4.11] | 4.66 (0.22) | 4.69 (0.22) |
| HC12             | G*6 | H1  | G*6 | [2.84, 4.44] | 5.59 (0.33) | 5.65 (0.32) |
| HC12             | G*6 | H1  | G16 | [2.58, 4.18] | 4.90 (0.38) | 4.92 (0.36) |
| HC4              | G*6 | H4' | C17 | [2.80, 4.40] | 4.27 (0.57) | 4.19 (0.57) |
| HC4              | G*6 | H4' | G18 | [4.00, 5.50] | 4.70 (0.59) | 4.58 (0.59) |
| HC5              | G*6 | H4' | G18 | [2.86, 3.86] | 2.93 (0.42) | 2.78 (0.44) |
| HC6              | G*6 | H1' | G18 | [3.78, 5.28] | 3.41 (0.41) | 3.56 (0.47) |
| HC6              | G*6 | H4' | G18 | [2.25, 3.25] | 2.83 (0.37) | 2.84 (0.35) |
| HC1              | G*6 | H1' | T8  | [2.16, 3.16] | 3.66 (0.62) | 3.61 (0.58) |
| HC1              | G*6 | H4' | T8  | [2.22, 3.22] | 3.43 (0.69) | 3.47 (0.70) |
| HC2              | G*6 | H1' | C17 | [3.59, 5.09] | 4.96 (0.35) | 5.04 (0.35) |
| HC2              | G*6 | H1' | T8  | [2.37, 3.37] | 5.77 (0.70) | 5.71 (0.67) |
| HC3              | G*6 | H4' | C17 | [3.25, 4.75] | 3.31 (0.40) | 3.32 (0.39) |
| HC3              | G*6 | H1' | C17 | [2.76, 4.36] | 5.05 (0.35) | 5.07 (0.34) |

Table S5: Free Energy Analysis of the 10*S* (+)- and 10*R* (-)-*trans-anti*-dG Adducts over Additional Different Blocked and Windowed Time Frames

|                                                   | 1.5–2 ns                                          | 1.5–2.5 ns     | 1.5–3 ns (shifted 5 ps) |
|---------------------------------------------------|---------------------------------------------------|----------------|-------------------------|
|                                                   | <u>10<i>S</i> (+)-<i>trans-anti</i>-dG adduct</u> |                |                         |
| $\langle E_{\text{elec}} \rangle$                 | 318.4 (44.1)                                      | 323.3 (45.4)   | 320.8 (43.4)            |
| $\langle E_{\text{vdW}} \rangle$                  | -192.1 (10.3)                                     | -192.1 (9.2)   | -193.6 (10.2)           |
| $\langle E_{\text{int}} \rangle$                  | 1010.7 (22.3)                                     | 1013.4 (22.0)  | 1011.6 (21.6)           |
| $\langle E_{\text{MM}} \rangle$                   | 1137.0 (46.4)                                     | 1144.6 (45.9)  | 1138.9 (41.2)           |
| $\langle G_{\text{nonpolar}} \rangle$             | 25.0 (0.2)                                        | 25.0 (0.2)     | 25.0 (0.2)              |
| $\langle G_{\text{PB}} \rangle$                   | -5705.6 (37.7)                                    | -5710.4 (39.3) | -5708.6 (40.7)          |
| $\langle G_{\text{solvation}} \rangle$            | -5680.5 (37.8)                                    | -5685.4 (39.4) | -5683.6 (40.8)          |
| $\langle G_{\text{PB}} + E_{\text{elec}} \rangle$ | -5387.2 (12.5)                                    | -5387.1 (12.6) | -5387.7 (11.9)          |
| $\langle E_{\text{MM}} + G_{\text{PB}} \rangle$   | -4568.6 (20.8)                                    | -4565.8 (19.9) | -4569.7 (21.3)          |
| $-TS$                                             |                                                   | -586.5         |                         |
| $G_{\text{tot}}$                                  | -5130.1                                           | -5127.3        | -5131.2                 |
|                                                   | <u>10<i>R</i> (-)-<i>trans-anti</i>-dG adduct</u> |                |                         |
| $\langle E_{\text{elec}} \rangle$                 | 309.2 (44.3)                                      | 307.8 (40.9)   | 316.9 (42.6)            |
| $\langle E_{\text{vdW}} \rangle$                  | -196.6 (8.9)                                      | -196.5 (8.9)   | -195.9 (10.5)           |
| $\langle E_{\text{int}} \rangle$                  | 1020.3 (18.8)                                     | 1017.0 (20.3)  | 1013.9 (20.4)           |
| $\langle E_{\text{MM}} \rangle$                   | 1132.9 (44.6)                                     | 1128.3 (40.0)  | 1134.9 (45.1)           |
| $\langle G_{\text{nonpolar}} \rangle$             | 24.8 (0.2)                                        | 24.8 (0.2)     | 24.8 (0.2)              |
| $\langle G_{\text{PB}} \rangle$                   | -5696.5 (43.1)                                    | -5693.0 (37.7) | -5700.6 (40.7)          |
| $\langle G_{\text{solvation}} \rangle$            | -5671.7 (43.1)                                    | -5668.2 (37.8) | -5675.8 (40.8)          |
| $\langle G_{\text{PB}} + E_{\text{elec}} \rangle$ | -5387.3 (11.8)                                    | -5385.3 (12.2) | -5383.7 (11.3)          |
| $\langle E_{\text{MM}} + G_{\text{PB}} \rangle$   | -4563.6 (18.9)                                    | -4564.7 (18.6) | -4565.7 (19.4)          |
| $-TS$                                             |                                                   | -587.9         |                         |
| $G_{\text{tot}}$                                  | -5126.7                                           | -5127.8        | -5128.8                 |
| $\Delta$                                          | -3.4                                              | 0.5            | -2.4                    |

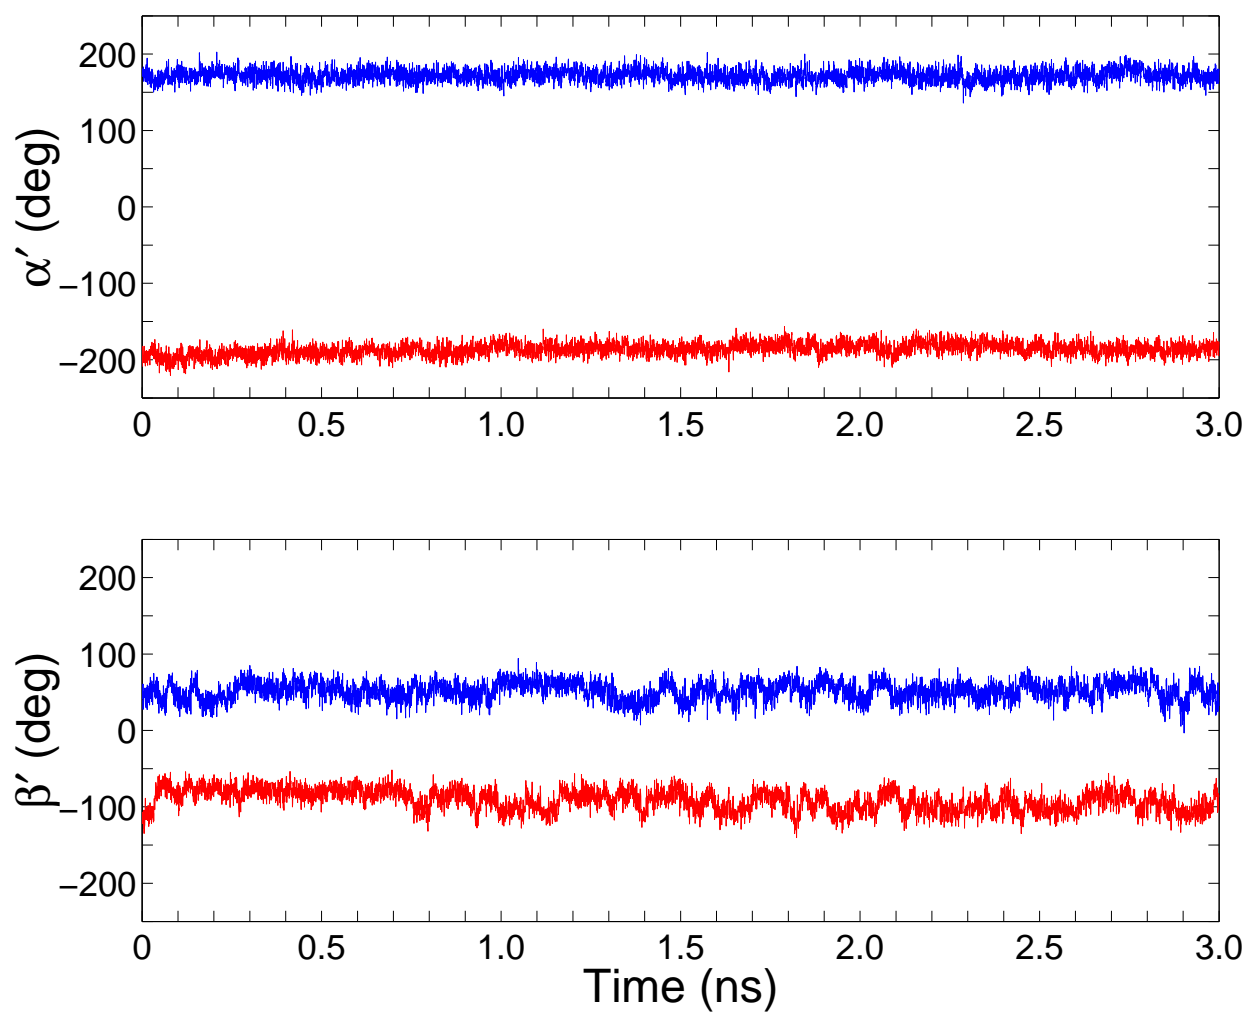

Figure S1: Torsion angles  $\alpha'$  and  $\beta'$  for the 10S (+)-*trans-anti*-dG adduct (red) and 10R (-)-*trans-anti*-dG adduct (blue) over the 3-ns production MD simulation. Definitions of  $\alpha'$  and  $\beta'$  are given in the caption to Figure 1.



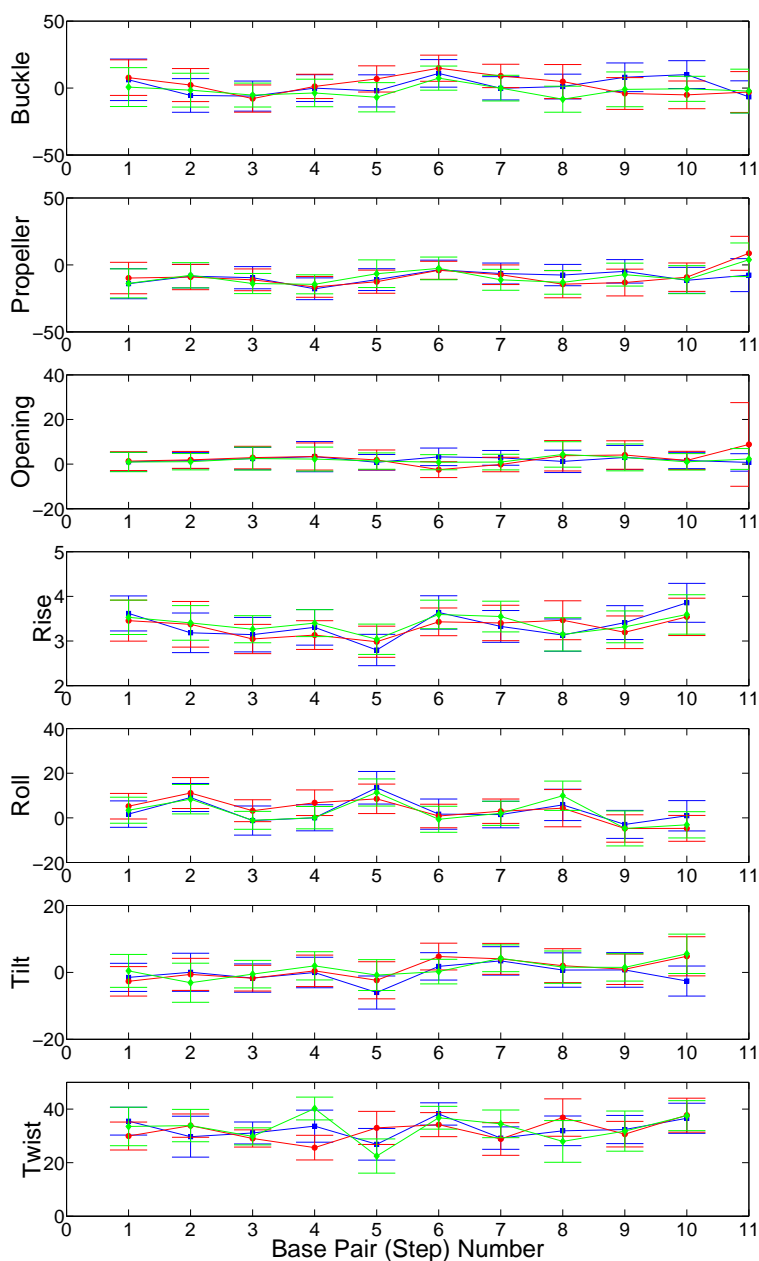

Figure S2: Average helicoidal parameters for the structures of the 10*S* (+)-*trans-anti*-dG adduct (red circles), 10*R* (-)-*trans-anti*-dG adduct (blue squares), and the unmodified control duplex (green diamonds) over 1.5–3 ns (3000 structures). The standard deviations are shown as error bars. The numbering scheme for the nucleotide base pair steps is that the C1–G22 to C2–G21 is step 1, the C2–G21 to A3–T20 is step 2, . . . , and so on. All values were calculated using Dials and Windows (Ravishanker et al., 1989).

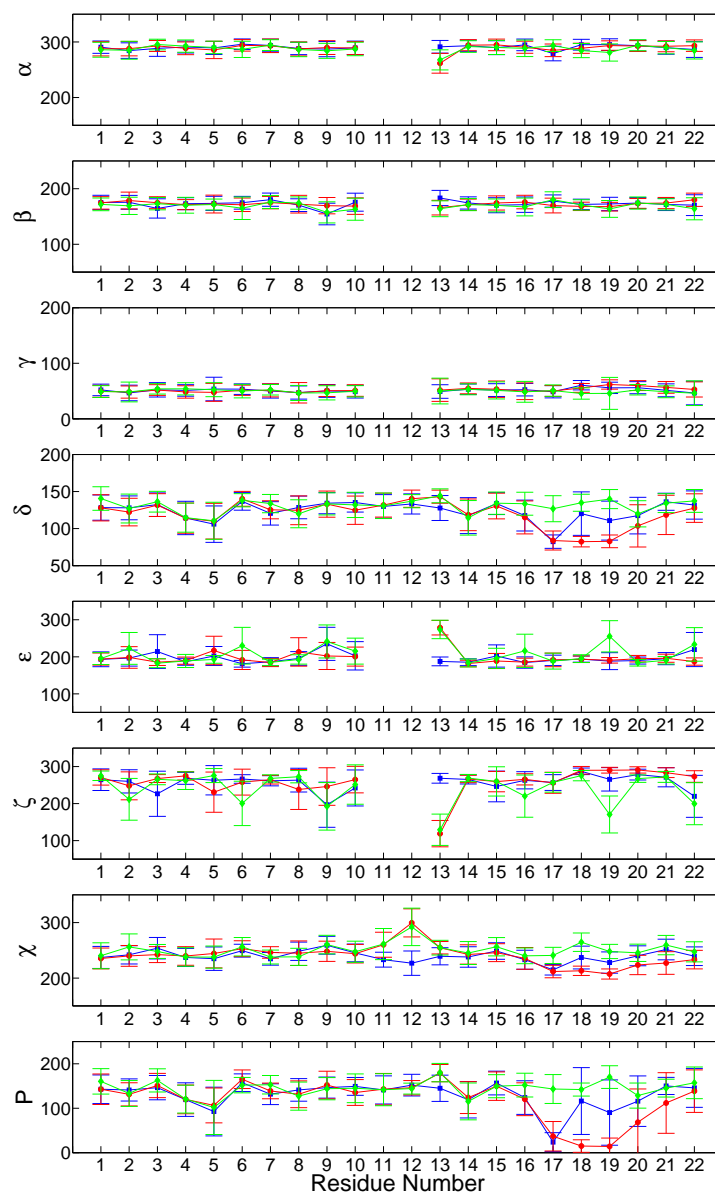

Figure S3: Average backbone torsional parameters for the structures of the 10*S* (+)-*trans-anti*-dG adduct (red circles), 10*R* (-)-*trans-anti*-dG adduct (blue squares), and the unmodified control duplex (green diamonds) over 1.5–3 ns (3000 structures). The standard deviations are shown as error bars. All values were calculated using Dials and Windows (Ravishanker et al., 1989). It should be noted that the residue numbers in Dials and Windows (Ravishanker et al., 1989) differ from the IUPAC convention (Saenger, 1984) as follows: For  $\alpha$ ,  $\beta$ , and  $\gamma$ , residue numbers 1–10 should be shifted +1, and for  $\epsilon$  and  $\zeta$ , residues 13–22 should be shifted –1 to accord with the IUPAC convention (Saenger, 1984).
